# Supplementary material
Source: PubMed Central journal article supplement (PMC4477633)
Supplement: NIHMS700121-supplement-Supplement.pdf [file NIHMS700121-supplement-Supplement.pdf]

## Supplemental Information

**SUPPLEMENTAL TABLE 4** Case Definitions for DBMD for MD STARnet

| Case Definition |                                                                                                                                                                                                                                                                                                                                                                                                                                                                                                                                                                                                                                                                                                                                                                                                                                                                                                                                                                                                                                   |
|-----------------|-----------------------------------------------------------------------------------------------------------------------------------------------------------------------------------------------------------------------------------------------------------------------------------------------------------------------------------------------------------------------------------------------------------------------------------------------------------------------------------------------------------------------------------------------------------------------------------------------------------------------------------------------------------------------------------------------------------------------------------------------------------------------------------------------------------------------------------------------------------------------------------------------------------------------------------------------------------------------------------------------------------------------------------|
| Definite        | Documented clinical symptoms referable to a dystrophinopathy and direct support of the diagnosis by at least 1 of the following criteria:<br>(1) DNA analysis demonstrating a dystrophin mutation.<br>(2) A muscle biopsy demonstrating abnormal dystrophin, by either immunostaining or Western blot analysis. If there is a family history demonstrating X-linked inheritance, no additional information is required on the muscle. If the diagnosis is based solely on Western blot analysis of muscle biopsy and clinical symptoms, then there must be a description that allows confirmation that adequate numbers of intact muscle fibers were present in the sample to interpret the dystrophin results. If the diagnosis is based on immunostaining, supporting evidence is required from additional stains, for example, utrophin, spectrin, neuronal nitric oxide synthase, or dystroglycans.<br>(3) An elevated creatine kinase, an X-linked pedigree, and an affected family member who meets criterion 1 or 2 above. |
| Probable        | Elevated creatine kinase, a family history consistent with an X-linked muscular dystrophy and documented clinical symptoms referable to a dystrophinopathy. Cases that have abnormal dystrophin results on muscle biopsy but lack the data required in the definition of definite cases, above, are called probable.                                                                                                                                                                                                                                                                                                                                                                                                                                                                                                                                                                                                                                                                                                              |
| Possible        | Elevated creatine kinase and documented clinical symptoms referable to a dystrophinopathy, but no muscle biopsy data, dystrophin mutation analysis, or family history to support the diagnosis. Cases that do not have creatine kinase information available in the clinical record, and who do not meet criteria for definite case, are called possible.                                                                                                                                                                                                                                                                                                                                                                                                                                                                                                                                                                                                                                                                         |
| Asymptomatic    | No clinical symptoms referable to a dystrophinopathy, but laboratory results and/or a positive family history that will likely result in the development of a dystrophinopathy phenotype.                                                                                                                                                                                                                                                                                                                                                                                                                                                                                                                                                                                                                                                                                                                                                                                                                                         |
| Female          | Onset of clinical symptoms referable to a dystrophinopathy appearing before age 21 y and either<br>(1) a dystrophin mutation or<br>(2) a muscle biopsy demonstrating abnormal dystrophin as required for definite case.                                                                                                                                                                                                                                                                                                                                                                                                                                                                                                                                                                                                                                                                                                                                                                                                           |

**SUPPLEMENTAL TABLE 5** Prevalence for DMD and BMD (Definite, Probable, Possible, and Asymptomatic Cases;  $n = 704$ ) per 10 000 Boys, Ages 5 to 9 Years, Identified by MD STARnet, 1991–2010

|                | Quinquennium       | Cases     | Population | Prevalence | 95% CI      |             |
|----------------|--------------------|-----------|------------|------------|-------------|-------------|
| All cases      | 1991–1995          | 167       | 778 716    | 2.14       | (1.83–2.50) |             |
|                | 1996–2000          | 200       | 869 321    | 2.30       | (1.99–2.64) |             |
|                | 2001–2005          | 190       | 879 300    | 2.16       | (1.86–2.49) |             |
|                | 2006–2010          | 147       | 942 791    | 1.56       | (1.32–1.83) |             |
| Race/ethnicity | Non-Hispanic white | 1991–1995 | 111        | 538 981    | 2.06        | (1.69–2.48) |
|                |                    | 1996–2000 | 121        | 537 239    | 2.25        | (1.87–2.69) |
|                |                    | 2001–2005 | 109        | 512 206    | 2.13        | (1.75–2.57) |
|                |                    | 2006–2010 | 89         | 504 201    | 1.77        | (1.42–2.17) |
|                | Non-Hispanic black | 1991–1995 | 10         | 121 965    | 0.82        | (0.39–1.51) |
|                |                    | 1996–2000 | 19         | 139 199    | 1.36        | (0.82–2.13) |
|                |                    | 2001–2005 | 14         | 135 329    | 1.03        | (0.57–1.74) |
|                |                    | 2006–2010 | 11         | 144 476    | 0.76        | (0.38–1.36) |
|                | Hispanic           | 1991–1995 | 29         | 88 570     | 3.27        | (2.19–4.70) |
|                |                    | 1996–2000 | 43         | 141 042    | 3.05        | (2.21–4.11) |
|                |                    | 2001–2005 | 43         | 176 768    | 2.43        | (1.76–3.28) |
|                |                    | 2006–2010 | 28         | 220 040    | 1.27        | (0.85–1.84) |
| Phenotype      | DMD                | 1991–1995 | 125        | 778 716    | 1.61        | (1.34–1.91) |
|                |                    | 1996–2000 | 141        | 869 321    | 1.62        | (1.37–1.91) |
|                |                    | 2001–2005 | 149        | 879 300    | 1.69        | (1.43–1.99) |
|                |                    | 2006–2010 | 113        | 942 791    | 1.20        | (0.99–1.44) |
|                | BMD                | 1991–1995 | 42         | 778 716    | 0.54        | (0.39–0.73) |
|                |                    | 1996–2000 | 58         | 869 321    | 0.67        | (0.51–0.86) |
|                |                    | 2001–2005 | 39         | 879 300    | 0.44        | (0.32–0.61) |
|                |                    | 2006–2010 | 32         | 942 791    | 0.34        | (0.23–0.48) |

CI, confidence interval.

**SUPPLEMENTAL TABLE 6** Prevalence in 2010 for DMD and BMD (Definite, Probable, Possible, and Asymptomatic Cases;  $n = 561$ ) per 10 000 Male Individuals, Ages 5 to 24 Years, Identified by MD STARnet, 1991–2010

|                           | Age Group, y | Cases | Population | Prevalence | 95% CI      |
|---------------------------|--------------|-------|------------|------------|-------------|
| <b>All cases</b>          |              |       |            |            |             |
|                           | All          | 561   | 3 827 532  | 1.47       | (1.35–1.59) |
|                           | 20–24        | 102   | 960 866    | 1.06       | (0.87–1.29) |
|                           | 15–19        | 168   | 985 263    | 1.71       | (1.46–1.98) |
|                           | 10–14        | 161   | 938 612    | 1.72       | (1.46–2.00) |
|                           | 5–9          | 130   | 942 791    | 1.38       | (1.15–1.64) |
| <b>Race/ethnicity</b>     |              |       |            |            |             |
| <b>Non-Hispanic white</b> |              |       |            |            |             |
|                           | All          | 328   | 2 147 039  | 1.53       | (1.37–1.70) |
|                           | 20–24        | 65    | 564 779    | 1.15       | (0.89–1.47) |
|                           | 15–19        | 98    | 558 178    | 1.76       | (1.43–2.14) |
|                           | 10–14        | 88    | 519 881    | 1.69       | (1.36–2.09) |
|                           | 5–9          | 77    | 504 201    | 1.53       | (1.21–1.91) |
| <b>Non-Hispanic black</b> |              |       |            |            |             |
|                           | All          | 44    | 605 232    | 0.73       | (0.53–0.98) |
|                           | 20–24        | 4     | 143 512    | 0.28       | (0.08–0.71) |
|                           | 15–19        | 18    | 166 175    | 1.08       | (0.64–1.71) |
|                           | 10–14        | 11    | 151 069    | 0.73       | (0.36–1.30) |
|                           | 5–9          | 11    | 144 476    | 0.76       | (0.38–1.36) |
| <b>Hispanic</b>           |              |       |            |            |             |
|                           | All          | 125   | 797 913    | 1.57       | (1.30–1.87) |
|                           | 20–24        | 22    | 185 830    | 1.18       | (0.74–1.79) |
|                           | 15–19        | 38    | 192 816    | 1.97       | (1.39–2.71) |
|                           | 10–14        | 38    | 199 227    | 1.91       | (1.35–2.62) |
|                           | 5–9          | 27    | 220 040    | 1.23       | (0.81–1.79) |
| <b>Phenotype</b>          |              |       |            |            |             |
| <b>DMD</b>                |              |       |            |            |             |
|                           | All          | 410   | 3 827 532  | 1.07       | (0.97–1.18) |
|                           | 20–24        | 69    | 960 866    | 0.72       | (0.56–0.91) |
|                           | 15–19        | 117   | 985 263    | 1.19       | (0.98–1.42) |
|                           | 10–14        | 125   | 938 612    | 1.33       | (1.11–1.59) |
|                           | 5–9          | 99    | 942 791    | 1.05       | (0.85–1.28) |
| <b>BMD</b>                |              |       |            |            |             |
|                           | All          | 147   | 3 827 532  | 0.38       | (0.32–0.45) |
|                           | 20–24        | 33    | 960 866    | 0.34       | (0.24–0.48) |
|                           | 15–19        | 50    | 985 263    | 0.51       | (0.38–0.67) |
|                           | 10–14        | 34    | 938 612    | 0.36       | (0.25–0.51) |
|                           | 5–9          | 30    | 942 791    | 0.32       | (0.21–0.45) |

CI, confidence interval.
